# Supplementary material for: Radioactive ion beam adaptive treatment of mouse tumors using in-beam PET
Source: Research Square preprint supplement (doi:10.21203/rs.3.rs-8500150/v1), 2026-01-08
Supplement: Supplementary file 1 [file b105abf53e58f296e6445e2f.docx]

**Supplementary Material**

**Supplementary Figure 1**. **Dose profiles experimental setup.** Schematic representation of the experimental setup used to measure 1D depth dose profiles at the mouse irradiation position shown in Figure 3B (black line). The PEAKFINDER was placed with the front window at the isocenter position. Before reaching the PEAKFINDER window the beam was passing the 2DRM, the collimators and the static absorber component (7.0 mm WET polyethylene and 51.5 mm WET aluminum).

**Supplementary Figure 2**. **SOBP dose maps experimental setup**. Schematic representation of the experimental setup used to measure 1D and 2D SOBP dose maps at the mouse irradiation position, with all the absorbers and collimators placed and aligned as for the R range mouse irradiations (15 mm WET polyethylene and 51.5 mm WET aluminum). Measurements are shown in Figure 3B (Blue dots) and 3C. The PTW OCTAVIOUS 1600 XDR detector was placed free in air with the detector window at the isocenter position. 2D dose maps at different depths in water were measured by increasingly adding PMMA slabs of different thickness in front of the detector.

**Supplementary Figure 3.** **Washout**. Individual post-irradiation ratios of the activity measured in the mouse body to that in the compensator, acquired after 20 Gy SOBP exposure for the mice presented in Figures 6 and 7. The fitted function follows the model reported in ref.35 and is shown as a dashed black line. The blue band represents the range of fitted biological decay constants obtained separately for the two datasets (long- and right-range acquisitions).

**Supplementary Figure 4. Skin toxicity in tumour-bearing mice**. Bars indicate the percentage of animals in each group exhibiting skin toxicity grades 0–4. Groups include non-irradiated tumor-bearing controls, tumor-free sham controls, as well as short (S), right (R) and long (L) range groups. Grade 4, which required euthanasia of the animals, was observed only in the tumour-bearing control group and was caused by the development of lesions on the tumour site. For each experimental group, animal numbers are detailed in the figure.

**Supplementary Figure 5.** **Acute esophageal toxicity.** Panels **A-B** show the photo and the µCT scan of a mouse from the L group two weeks after irradiation, manifesting breathing issues, severe weight loss, and altered food intake, which was indicated by the hunched posture and air-filled areas of the gastrointestinal tract seen on the CT. The animal had to be euthanized two weeks post irradiation according to the ethical protocol, having reached Grade 3 toxicity. The hematoxylin-eosin staining of the esophagus (**C**) of a sham irradiated control mouse is compared to esophagus (**D**) of the L-group animal shown in the panels **A-B**. Circles indicate the difference between the normal keratinized epithelium of the esophagus (**E**) and the surface epithelial alteration (SEA, **F**), with the partial loss of the keratinised layer. The arrows show the normal monolayer of basal cells (**E**) and the basal zone hyperplasia (BZH, **F**). The curly brackets show the normal epithelium thickness (**E**) and the consequence of the hyperproliferation of the basal cells layer, resulting in a thickened epithelium (**F**). The different parts of the esophagus are described in the panel and the figures **E-F** are the magnifications of the **C-D**, respectively.

**Supplementary Figure 6. Esophageal epithelium thickness**. Distribution of per-mouse median esophageal epithelial thicknesses, calculated from all individual measurements in the control (blue), R (green), and L (orange) irradiation groups. Frequency distributions of the esophagus thickness are shown in Fig. 9G. Boxes represent the interquartile range (25th–75th percentiles), central orange lines are group medians, and whiskers indicate the full measurement range (minimum to maximum). Individual points correspond to single animals. Pairwise group comparisons were performed using Mann–Whitney tests applied to per-mouse medians, and resulting p-values are shown above the corresponding brackets.

**Supplementary Figure 7**. **Water phantom measurements**. Water phantom measurements of the **A.** vertical and **B.** horizontal 2D dose distributions in the central plane along the beam direction respectively. **C.** Water phantom measurement of the beam spot 2D dose distribution at the minimal water equivalent depth (z = 21 mm) inside the phantom. **D.** Horizontal and vertical beam profiles acquired on the central line of the beam spot shown in panel C. All the data are normalized to the maximum dose.

**Supplementary Video 1. Dynamic beam repositioning.** Dynamic PET activity signal acquired during three consecutive irradiations (corresponding to the three range settings) with a 5 Gy collimated monoenergetic ¹¹C beam, overlaid on the SARRP scan of the dead-mouse under irradiation. Each irradiation consists of 4 min of beam delivery followed by 10 min of decay. After each irradiation, range shifter plates were removed, allowing the beam to reach greater depths within the mouse body (from S to L range). Three distinct color scales are used to indicate the activity levels for each range, reflecting both isotope decay and cumulative signal build-up over time, as reported in the right panel. Each frame corresponds to 2 min of PET acquisition. The white “×” markers indicate the positions along the beam axis corresponding to the 80% fall-off of the collimated 11C-beam distribution at the three different ranges in the mouse body.

**Supplementary Video 2**. **S-experiment imaging**. Dynamic PET activity signal accumulation during two consecutive irradiations for the S range setting, one with the 5 Gy collimated monoenergetic ¹¹C beam and the following one with the 20 Gy SOBP, overlaid on the SARRP scan of the alive mouse under irradiation. Monoenergetic irradiation consists of 4 min of beam delivery followed by 10 min of decay, while for the SOBP 20 min of beam delivery and 10 min of decay. After the monoenergetic irradiation, the range modulator was added and range plates were removed, allowing the beam to reach the same depth obtained with the monoenergetic probe beam used for range verification. Two distinct color scales are used to indicate the activity levels for each irradiation, reflecting both isotope decay and cumulative signal build-up over time, as reported in the right panel. Each frame corresponds to 2 min of PET acquisition. The white “×” marker indicates the position along the beam axis corresponding to the 80% fall-off of the collimated 11C pure beam distribution.

**Supplementary Video 3. R-experiment imaging**. Dynamic PET activity signal accumulation during two consecutive irradiations for the R range setting, one with the 5 Gy collimated monoenergetic ¹¹C beam and the following one with the 20 Gy SOBP, overlaid on the SARRP scan of the alive mouse under irradiation. Monoenergetic irradiation consists of 4 min of beam delivery followed by 10 min of decay, while for the SOBP 20 min of beam delivery and 10 min of decay. After the monoenergetic irradiation, the range modulator was added and range plates were removed, allowing the beam to reach the same depth obtained with the monoenergetic probe beam used for range verification. Two distinct color scales are used to indicate the activity levels for each irradiation, reflecting both isotope decay and cumulative signal build-up over time, as reported in the right panel. Each frame corresponds to 2 min of PET acquisition. The white “×” marker indicates the position along the beam axis corresponding to the 80% fall-off of the collimated 11C pure beam distribution.

**Supplementary Video 4.**  **L-experiment imaging**. Dynamic PET activity signal accumulation during two consecutive irradiations for the L range setting, one with the 5 Gy collimated monoenergetic ¹¹C beam and the following one with the 20 Gy SOBP, overlaid on the SARRP scan of the alive mouse under irradiation. Monoenergetic irradiation consists of 4 min of beam delivery followed by 10 min of decay, while for the SOBP 20 min of beam delivery and 10 min of decay. After the monoenergetic irradiation, the range modulator was added and range plates were removed, allowing the beam to reach the same depth obtained with the monoenergetic probe beam used for range verification. Two distinct color scales are used to indicate the activity levels for each irradiation, reflecting both isotope decay and cumulative signal build-up over time, as reported in the right panel. Each frame corresponds to 2 min of PET acquisition. The white “×” marker indicates the position along the beam axis corresponding to the 80% fall-off of the collimated 11C pure beam distribution.
